# Supplementary material
Source: publisher site journal article supplement (https://www.dovepress.com/article/546282)
Supplement: Supplementary file 1 [file 546282_Supplementary%20materials%20revisions%2010.28.25%20CLEAN.docx]

Original Research

Pundole et al

# **Supplementary materials**

Additional information regarding the data sources and methodologies used in the observational studies conducted in the United Kingdom, Spain, Taiwan, and South Korea are provided below.

## **Data sources**

*The United Kingdom*

This study used data from the National Cancer Registration and Analysis System (NCRAS), which is a comprehensive, population-based cancer registry for patients diagnosed with cancer within the National Health Service (NHS) in England.1

The authors did not have direct access to patient-level data but instead worked with synthetic data from Simulcrum, which mimics data within the NCRAS. Once the analytical strategy and code were approval by the NHS England's Office for Data Release and the Caldicott Guardian, the authors were able to obtain aggregated analyses from the NCRAS based on the prepared code. This use of data is considered secondary use with deidentified data, compliant with the Information Commissioner's Code of Anonymization, and therefore, no additional ethics approvals were required.

To further prevent patient identification inadvertently, the following rules were applied:

1. Results and corresponding percentages with counts between 1 and 5 were suppressed.
2. Continuous descriptive measures (e.g. mean, median) with group sizes smaller than 6 were suppressed.
3. Kaplan-Meier estimations with fewer than 6 patients were suppressed.
4. Secondary suppression was applied to the next highest non-zero number if a categorical value between 1 and 5 was suppressed (via suppression rule 1), and other values could indirectly identify the suppressed number.

*Spain*

This study used secondary data from the Spanish Thoracic Tumor Registry (TTR), a continuously enrolling multicenter study of lung and thoracic tumor patients initiated in August 2016. The registry is currently recruiting across 89 cancer centers in Spain to collect and harmonize population-based data at a national level. Information on small cell lung cancer (SCLC) patients was collected both prospectively and retrospectively. Patients could be enrolled at any point in their treatment journey (e.g. at diagnosis or at treatment initiation), and thus data are collected both retrospectively (to capture treatments from diagnosis) and prospectively. Deceased patients were eligible with their data being obtained retrospectively using a deceased-persons consent waiver.

The institutional review board of Hospital Universitario Puerta de Hierro-Majadahonda (No. PI 148/15) approved the TTR protocol. Approved in 2016 by the Spanish Agency for Medicines and Medical Devices, the TTR is registered in the ClinicalTrials.gov database (NCT02941458) and was conducted in accordance with the Declaration of Helsinki. The registry is overseen by the Spanish Lung Cancer Group (Grupo Español de Cáncer de Pulmón, GECP), an independent and multidisciplinary network of oncologists and medical professionals from public and private hospitals. All living patients consented to participate, and consent for deceased patients was waived by the ethics committee of the participating center.

*Taiwan*

Data for this study were obtained from three databases provided by the Health and Welfare Data Science Center (HWDSC): Taiwan Cancer Registry database (TCR), National Health Insurance Research Database (NHIRD), and Death Registry.

The Taiwan Cancer Registry (TCR) is a nationwide registry organized and funded by the Ministry of Health and Welfare that monitors cancer incidence at the national level, containing over 800,000 records spanning the past four decades. Since 2011, TCR has collected cancer site-specific factors such as carcinogenic mutations and life risk factors, including alcohol, betel nut, and cigarette use. Although TCR records the types of first-line (1L) therapies, for example, chemotherapy, radiotherapy, and surgery, it does not include detailed information on specific drugs.

The National Health Insurance Research Database (NHIRD) provides nationwide claims data covering detailed medical records of over 99% of Taiwan's population. While TCR captures the initial treatment data, NHIRD provides data on subsequent treatments administered in clinical practice. Furthermore, TCR, NHIRD and death records can be linked via the encrypted personal ID number, making it possible to assess overall survival.

*South Korea*

This study identified patients from the Samsung Medical Center (SMC). Data were obtained from the Clinical Data Warehouse (CDW) of SMC, a real-time database that stores patient information for research and clinical activities. Mortality data was linked with National Administrative Data from the Ministry of the Interior and Safety. The study received approval from the Institutional Review Board (IRB) of SMC, and the requirement for informed consent was waived as all data were de-identified (IRB no. SMC 2023-05-088).

## **Study populations**

All relevant information regarding study populations for the UK, Spain, and South Korea studies were detailed in the main text. However, additional staging information and inclusion criteria are provided here for the study conducted in Taiwan. Patients from the TCR who were recorded with clinical stage code E in electronic health records for extensive stage SCLC were captured. Patients with the following criteria were excluded: (1) one or more primary cancer diagnosis in the NHIRD within one year prior to or on the date of initial diagnosis in TCR, (2) diagnosis with leukemia, lymphoma, or Kaposi’s sarcoma, (3) could not be linked to the NHIRD database, and (4) initial SCLC diagnosis in the NHIRD was more than 60 days apart from the initial SCLC diagnosis in TCR.

## **Data elements**

*The United Kingdom*

Systemic anti-cancer treatment history including chemotherapies, targeted therapies, and immunotherapies were assessed. Lines of therapy were derived using an algorithm formulated by the study team. Death was ascertained via the National Death Registry.

*Spain*

Data in the TTR were collected through chart reviews and documented in electronic case report forms (eCRF). The details of the data elements captured have been previously published.2,3

*Taiwan*

Patient characteristics, including age, sex, year of initial first diagnosis, initial treatment status, and smoking status, were captured from the TCR.

*South Korea*

Demographic and clinical characteristics were collected at baseline, defined as 30 days before or after SCLC diagnosis.

**Patient flow diagram**

Additional information on patient attrition in the observational studies conducted in the United Kingdom and Spain are provided below. For studies conducted in the US4, Japan5, South Korea6, and Taiwan7, we refer the readers to complementary country-specific publications.

*The United Kingdom*

Patients with an incident SCLC diagnosis between 01 January 2013 and 31 December 2020

N=29,808

Aged ≥18 at time of diagnosis

N=29,807

At least 1 SACT treatment for SCLC within 30 days prior to, on, or at any time after incident diagnosis

N=19,367

Number of patients in the CAS diagnosed with SCLC, aged ≥18, who received at least 1 SACT treatment and not meeting any exclusion criteria

N=17,103

- Diagnosed with any other primary malignancy (N=1,410)
- Received any SACT more than 30 days prior to incident SCLC diagnosis (N=56)
- Actively treated with treatments included in the Cancer Drugs Fund registry at time of analysis (N=7)
- Missing vital status (N=12)
- Missing TNM staging information (N=779)

Documented extensive stage disease at diagnosis

N=14,701

*Spain*

SCLC patients diagnosed between 01 January 2016 and 30 April 2022

N=2,697

SASACT treated SCLC patients

N=2,386

No evidence of SACT

N=311

- Treated with an anti-cancer agent that was under clinical development at the time of treatment (N=80)
- Diagnosed with lung cancer on or before SCLC diagnosis (N= 3)
- Diagnosed with limited-stage SCLC at first presentation (N=777)

ES-SCLC

N=1,526

**References**

1. Henson K, Elliss-Brookes L, Coupland V, et al. Data resource description: National Cancer Registration Dataset in England. *Int J Epidemiol.* 2020;49(1):16-16h. doi:10.1093/ije/dyz076
2. Franco F, Carcereny E, Guirado M, et al. Epidemiology, treatment, and survival in small cell lung cancer in Spain: Data from the Thoracic Tumor Registry. *PLoS One.* 2021;16:e0251761. doi:10.1371/journal.pone.0251761.
3. Provencio M, Carcereny E, Rodríguez-Abreu D, et al. Lung cancer in Spain: information from the Thoracic Tumors Registry (TTR study). *Transl Lung Cancer Res*. 2019;8(4):461-475. doi:10.21037/tlcr.2019.08.05
4. Shaw J, Pundole X, Balasubramanian A, et al. Recent treatment patterns and real-world survival following first-line anti-PD-L1 treatment for extensive-stage small cell lung cancer. *Oncologist*. 2024;29(12):1079-1089. doi:10.1093/oncolo/oyae234
5. Horinouchi H, Chang CS, Shaw J, Archangelidi O, Balasubramanian A, Pundole X. Real-world treatment patterns and survival in extensive stage small-cell lung cancer in Japan. *Jpn J Clin Oncol*. 2025;55(4):383-390. doi:10.1093/jjco/hyae175
6. Park S, Kang D, Lee H, Lim H, Cho J, Ahn M-J , Kim J. EP.13B.02 Real-World Insights: Treatment Patterns and Overall Survival in Patients with Small-Cell Lung Cancer in South Korea a Single Center Experience. *Journal of Thoracic Oncology.* 2024;19(10):S663-S664. doi:10.1016/j.jtho.2024.09.1253
7. Huang K, Wang CC, Yang Y, Chen WJ, Chang CH, Su PL. 524P Treatment pattern and overall survival by lines of therapy among patients with advanced small cell lung cancer in Taiwan. A*nnals of Oncology*. 2023;34:S1675. doi:10.1016/j.annonc.2023.10.603
